# Supplementary material for: A novel 3D Zn-coordination polymer based on a multiresponsive fluorescent sensor demonstrating outstanding sensitivities and selectivities for the efficient detection of multiple analytes
Source: Royal Society of Chemistry journal article supplement (doi:10.1039/d1dt02260a), 2021-01-01
Supplement: d1dt02260a1.pdf [file d1dt02260a1.pdf]

Supplementary Material (ESI)

**A novel 3D Zn-coordination polymer based on a multiresponsive  
fluorescent sensor demonstrating outstanding sensitivities and  
selectivities for the efficient detection of multiple analytes**

Yu Liu,<sup>a</sup> Yan Wang,<sup>a</sup> Xiao-Sa Zhang,<sup>a</sup> Yu-Shu Sheng,<sup>a</sup> Wen-Ze Li,<sup>a\*</sup> Ai-Ai Yang,<sup>a</sup>  
Jian Luan,<sup>b\*</sup> Hong-Zhu Liu<sup>c</sup> and Zhong-Gang Wang<sup>d</sup>

<sup>a</sup> College of Science, Shenyang University of Chemical Technology, Shenyang, 110142, P. R. China

<sup>b</sup> College of Sciences, Northeastern University, Shenyang, 100819, P. R. China

<sup>c</sup> Post-Doctoral Research Station of Dalian Zhenbang Fluorocarbon Paint Stock Co., Ltd., Dalian, 116036, P. R. China

<sup>d</sup> State Key Laboratory of fine Chemicals, Department of Polymer Science and Materials, School of Chemical Engineering, Dalian University of Technology, Dalian, 116024, P. R. China

**Table S1.** Crystallographic data for complex **1**.

| Complex                                                         | <b>1</b>                                                                       |
|-----------------------------------------------------------------|--------------------------------------------------------------------------------|
| Empirical formula                                               | C <sub>34</sub> H <sub>34</sub> N <sub>4</sub> Zn <sub>2</sub> O <sub>14</sub> |
| Formula weight                                                  | 853.39                                                                         |
| Crystal system                                                  | Monoclinic                                                                     |
| Space group                                                     | <i>P21/n</i>                                                                   |
| <i>a</i> (Å)                                                    | 8.8708(5)                                                                      |
| <i>b</i> (Å)                                                    | 28.9726(15)                                                                    |
| <i>c</i> (Å)                                                    | 13.5048(7)                                                                     |
| $\alpha$ (°)                                                    | 90                                                                             |
| $\beta$ (°)                                                     | 91.9020(10)                                                                    |
| $\gamma$ (°)                                                    | 90                                                                             |
| <i>V</i> (Å <sup>3</sup> )                                      | 3469.0(3)                                                                      |
| <i>Z</i>                                                        | 4                                                                              |
| <i>D<sub>c</sub></i> (g cm <sup>-3</sup> )                      | 1.634                                                                          |
| <i>R</i> <sub>int</sub>                                         | 0.0284                                                                         |
| GOF                                                             | 1.008                                                                          |
| <i>R</i> <sub>1</sub> <sup>a</sup> [ <i>I</i> > 2σ( <i>I</i> )] | 0.0358                                                                         |
| <i>wR</i> <sub>2</sub> <sup>b</sup> (all data)                  | 0.0519                                                                         |

$$^a R_1 = \Sigma||F_o| - |F_c|| / \Sigma|F_o|, \quad ^b wR_2 = \Sigma[w(F_o^2 - F_c^2)^2] / \Sigma[w(F_o^2)]^{1/2}.$$

## Supplementary Material (ESI)

**Table S2** Selected bond distances (Å) and angles (°) for complex **1**.

|                  |            |                     |            |
|------------------|------------|---------------------|------------|
| Zn(1)–O(1W)      | 1.9695(17) | Zn(2)–O(7)#1        | 1.9581(16) |
| Zn(1)–O(4)       | 1.9734(16) | Zn(2)–O(3)          | 2.0109(15) |
| Zn(1)–O(1)       | 1.9748(17) | Zn(2)–N(4)#2        | 2.0341(18) |
| Zn(1)–N(1)       | 2.0496(19) | N(4)–Zn(2)#4        | 2.0341(18) |
| Zn(2)–O(5)       | 1.9574(17) | O(7)–Zn(2)#5        | 1.9581(16) |
| O(1W)–Zn(1)–O(4) | 102.05(7)  | O(5)–Zn(2)–O(7)#1   | 100.42(8)  |
| O(1W)–Zn(1)–O(1) | 105.07(7)  | O(5)–Zn(2)–O(3)     | 116.94(7)  |
| O(4)–Zn(1)–O(1)  | 133.80(7)  | O(7)#1–Zn(2)–O(3)   | 96.15(7)   |
| O(1W)–Zn(1)–N(1) | 102.48(7)  | O(5)–Zn(2)–N(4)#2   | 111.84(8)  |
| O(4)–Zn(1)–N(1)  | 100.94(7)  | O(7)#1–Zn(2)–N(4)#2 | 130.34(8)  |
| O(1)–Zn(1)–N(1)  | 108.68(8)  | O(3)–Zn(2)–N(4)#2   | 101.22(7)  |

Symmetry codes: #1  $x + 1/2, -y + 1/2, z - 1/2$ ; #2  $-x + 1/2, y - 1/2, -z + 1/2$ ; #4  $-x + 1/2, y + 1/2, -z + 1/2$ ; #5  $x - 1/2, -y + 1/2, z + 1/2$ .

**Table S3** List of CPs utilized in the sensing of  $Mg^{2+}$  in water.

| CP                                                                                                                                     | Detection limit               | Reference |
|----------------------------------------------------------------------------------------------------------------------------------------|-------------------------------|-----------|
| Boron-doped carbon dots (BCDs)                                                                                                         | 39 $\mu$ M                    | S1        |
| $[Zn_2(3\text{-bpah})(\text{bpta})(H_2O)] \cdot 3H_2O$                                                                                 | 10 $\mu$ M                    | This work |
| 8-hydroxyquinoline-5-benzothiazole (QB)                                                                                                | $1.40 \times 10^{-1}$ $\mu$ M | S2        |
| Quinoline-based fluorescent probe (QC)                                                                                                 | $6.28 \times 10^{-2}$ $\mu$ M | S3        |
| $[Ln(\text{BIPA-TC})_{0.5}(\text{DMA})_2(\text{NO}_3)] \cdot \text{DMA} \cdot H_2O$<br>H <sub>4</sub> BIPA-TC=tetra-carboxylate ligand | $1.53 \times 10^{-4}$ $\mu$ M | S4        |

**Table S4** List of CPs utilized in the sensing of  $Cr_2O_7^{2-}$  in water.

| CP                                                           | Detection limit               | Reference |
|--------------------------------------------------------------|-------------------------------|-----------|
| $[Zn_4(3\text{-dpyb})_2(\text{odpa})_2(H_2O)_3] \cdot 4H_2O$ | 41.50 $\mu$ M                 | S5        |
| $\{[Zn_2(L_2)_2(H_2O)_4] \cdot H_2O\}$                       | 2.60 $\mu$ M                  | S6        |
| $[Zn_2(\text{TPOM})(\text{NH}_2\text{-BDC})_2] \cdot 4H_2O$  | 3.90 $\mu$ M                  | S7        |
| $[Zn(\text{DDB})(\text{DPE})] \cdot H_2O$                    | 0.64 $\mu$ M                  | S8        |
| $[Zn_2(3\text{-bpah})(\text{bpta})(H_2O)] \cdot 3H_2O$       | $1.00 \times 10^{-3}$ $\mu$ M | This work |

## Supplementary Material (ESI)

**Table S5.** Comparison of the overlap between complex **1** and various analytes.

| CP                                                                                                                                                        | Analyte overlap                                                                                                                           | Reference |
|-----------------------------------------------------------------------------------------------------------------------------------------------------------|-------------------------------------------------------------------------------------------------------------------------------------------|-----------|
| $[\text{Zn}_4(\mu_3\text{-OH})_2(\text{BTC})_2(\text{BBI4PY})_2] \cdot 10\text{H}_2\text{O}$                                                              | $\text{Fe}^{3+}$ , TNP                                                                                                                    | S9        |
| g-CNQDs@Zn-MOF<br>g-CNQDs = graphitic carbon nitrides quantum dots                                                                                        | riboflavin (RF)                                                                                                                           | S10       |
| $[\text{Zn}_2(\text{NDC})_2(\text{bpy})] \cdot \text{G}_x$<br>NDC = 2,6-naphthalenedicarboxylic acid,<br>bpy = 4,40-bipyridine, G=guest solvent molecules | Nitroaromatics                                                                                                                            | S11       |
| $[\text{Zn}(\text{OPE}) \cdot 2\text{H}_2\text{O}]$<br>OPE = oligo-phenyleneethynylene-dicarboxylic                                                       | DSMP                                                                                                                                      | S12       |
| $[\text{Zn}_2(\text{NDC})_2(\text{DPTTZ})]$<br>NDC = naphthalene dicarboxylate<br>DPTTZ = <i>N,N'</i> -di(4-pyridyl)thiazolo-[5,4-d]thiazole              | $\text{Hg}^{2+}$                                                                                                                          | S13       |
| $[\text{Zn}_3(\text{bpg})_{1.5}(\text{azdc})_3] \cdot (\text{DMF})_{5.9} \cdot (\text{H}_2\text{O})_{1.05}$                                               | $\text{Fe}^{3+}$ , NZF,<br>TNP                                                                                                            | S14       |
| $[\text{Zn}_3(\text{DDB})(\text{DPE})] \cdot \text{H}_2\text{O}$<br>H5DDB = 3,5-di(2',4'-dicarboxylphenyl)benzoic acid<br>DPE = 1,2-di(4-pyridyl)ethylene | $\text{Fe}^{3+}$ , $\text{Cr}^{3+}$ ,<br>$\text{Cr}_2\text{O}_7^{2-}$ ,<br>$\text{CrO}_4^{2-}$ , $\text{MnO}_4^-$<br>, 2,6-Dich-4-<br>NA) | S15       |
| $[\text{Zn}_2(\text{IDS})(\text{bipy})_{1.5}]$<br>H <sub>4</sub> IDS = meso-iminodisuccinic acid<br>bipy = 4,4-bipyridine                                 | $\text{Fe}^{3+}$ , TNP                                                                                                                    | S16       |
| $[\text{Zn}(\text{TIPA})(\text{NO}_3)_2(\text{H}_2\text{O})] \cdot 5\text{H}_2\text{O}$<br>TIPA = tri(4-imidazolylphenyl)amine                            | TNP, 4-NP,<br>RDX, HMX,<br>DMNB                                                                                                           | S17       |
| $[\text{Zn}(\text{QDA})] \cdot 0.5\text{H}_2\text{O} \cdot 0.7\text{DMF}$<br>H <sub>2</sub> QDA = quinoline-2,6-dicarboxylic acid                         | $\text{Fe}^{3+}$                                                                                                                          | S18       |

### Supplementary Material (ESI)

|                                                                                                                                    |                                                                                                                                      |              |
|------------------------------------------------------------------------------------------------------------------------------------|--------------------------------------------------------------------------------------------------------------------------------------|--------------|
| Zn(DMA)(TBA)                                                                                                                       |                                                                                                                                      |              |
| H <sub>2</sub> TBA = 4-(1H-tetrazol-5-yl)-benzoic acid                                                                             | Al <sup>3+</sup> , NACs                                                                                                              | S19          |
| (Zn <sub>2</sub> (DHBDC)(DMF)(H <sub>2</sub> O) <sub>2</sub> )                                                                     |                                                                                                                                      |              |
| H <sub>4</sub> dondc = 1,5-dioxido-2,6-naphthalenedicarboxylic acid                                                                | TBBPA                                                                                                                                | S20          |
| [Zn <sub>4</sub> (L <sup>3-</sup> ) <sub>2</sub> (O <sup>2-</sup> )(H <sub>2</sub> O) <sub>2</sub> ]·4EtOH <sub>n</sub> /Tb@Zn-MOF |                                                                                                                                      |              |
| H <sub>3</sub> L = 4,4',4''-[(1,3,5-triazine-2,4,6-triyl)tris-(sulfanediyl)]tribenzoic acid                                        | PO <sub>4</sub> <sup>3-</sup>                                                                                                        | S21          |
| [Zn <sub>2</sub> (4-bpft) <sub>2</sub> (1,3-BDC) <sub>2</sub> ]·2H <sub>2</sub> O                                                  |                                                                                                                                      |              |
| [Zn(4-bpft)(5-MIP)]                                                                                                                |                                                                                                                                      |              |
| [Zn(4-bpft)(5-HIP)]                                                                                                                |                                                                                                                                      |              |
| 4-bpft = <i>N,N'</i> -bis(4-pyridine formamide)-3,4-thiophene                                                                      | Hg <sup>2+</sup> , Purines                                                                                                           | S15          |
| 1,3-H <sub>2</sub> BDC = isophthalic acid                                                                                          |                                                                                                                                      |              |
| 5-H <sub>2</sub> MIP = 5-methylisophthalic acid                                                                                    |                                                                                                                                      |              |
| H <sub>2</sub> HIP = 5-hydroxyisophthalic acid                                                                                     |                                                                                                                                      |              |
| [Zn <sub>4</sub> (3-dpyb) <sub>2</sub> (odpa) <sub>2</sub> (H <sub>2</sub> O) <sub>3</sub> ]·4H <sub>2</sub> O                     | Fe <sup>3+</sup> , Cr <sub>2</sub> O <sub>7</sub> <sup>2-</sup> ,<br>MnO <sub>4</sub> <sup>-</sup>                                   | S22          |
| [Zn(tptc) <sub>0.5</sub> (bpy)(H <sub>2</sub> O)]                                                                                  |                                                                                                                                      |              |
| bpy = 2,2'-bipyridine, H <sub>4</sub> tptc = <i>p</i> -terphenyl-2,2'',5'',5'''-tetracarboxylate acid                              | Cr <sub>2</sub> O <sub>7</sub> <sup>2-</sup>                                                                                         | S23          |
| [Zn <sub>8</sub> (ad) <sub>4</sub> (BPDC) <sub>6</sub> ·2Me <sub>2</sub> NH <sub>2</sub> ·8DMF·11H <sub>2</sub> O]                 |                                                                                                                                      |              |
| ad = adeninate                                                                                                                     | Fe <sup>3+</sup> , Al <sup>3+</sup> ,<br>Cr <sub>2</sub> O <sub>7</sub> <sup>2-</sup>                                                | S24          |
| BPDC = biphenyldicarboxylate                                                                                                       |                                                                                                                                      |              |
| [Zn <sub>2</sub> (3-bpah)(bpta) <sub>2</sub> (H <sub>2</sub> O)]·3H <sub>2</sub> O                                                 | Fe <sup>3+</sup> , Mg <sup>2+</sup> ,<br>Cr <sub>2</sub> O <sub>7</sub> <sup>2-</sup> ,<br>MnO <sub>4</sub> <sup>-</sup> , NB,<br>NM | This<br>work |

## Supplementary Material (ESI)

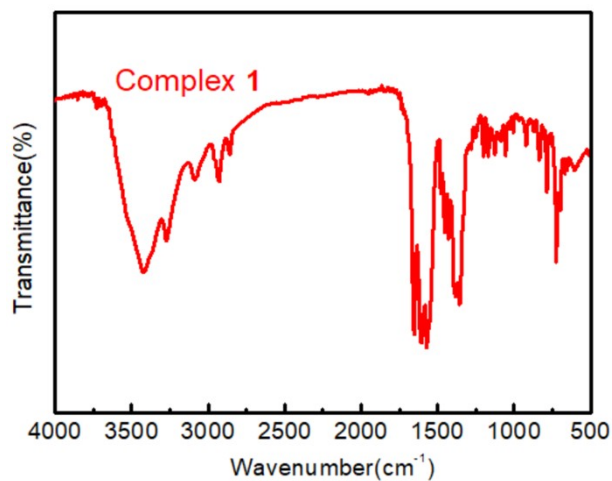

**Fig. S1** The IR spectrum of complex 1.

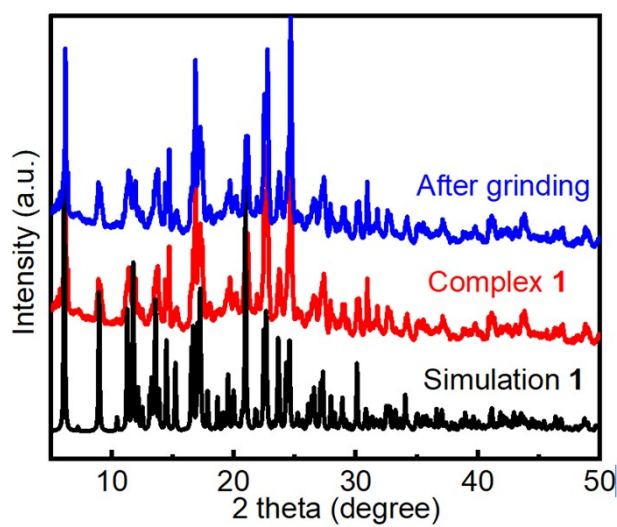

**Fig. S2** The powder X-ray diffraction patterns of simulated 1, fresh sample 1 and complex 1 after grinding.

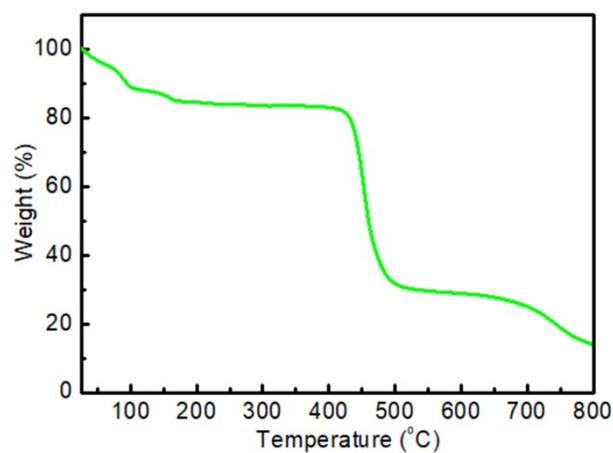

**Fig. S3** The TG curve of complex 1.

## Supplementary Material (ESI)

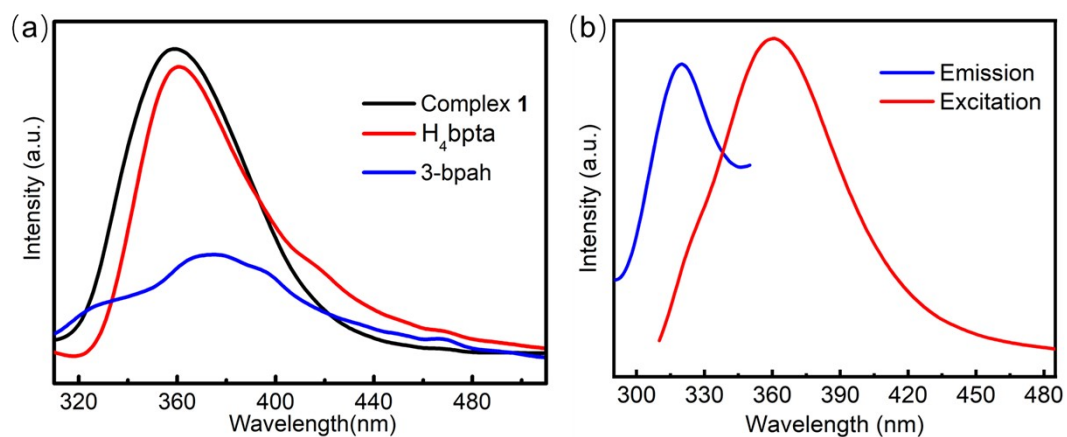

**Fig. S4** The emission spectra of complex **1**, H<sub>4</sub>bpta and 3-bpah in the solid state. (b) The solid excitation and emission spectra of **1**.

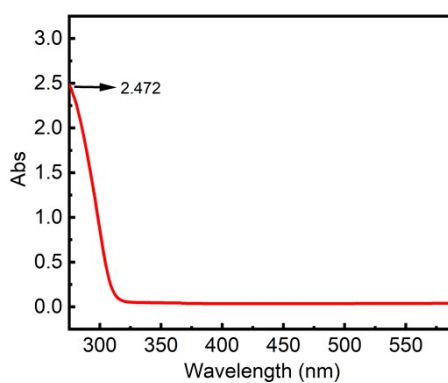

**Fig. S5** UV-Vis adsorption spectrum of the suspension of **1**.

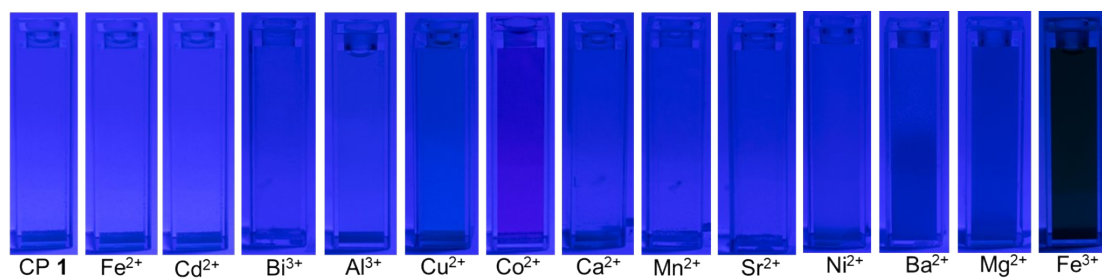

**Fig. S6** Fluorometric pictures with various metal ions.

## Supplementary Material (ESI)

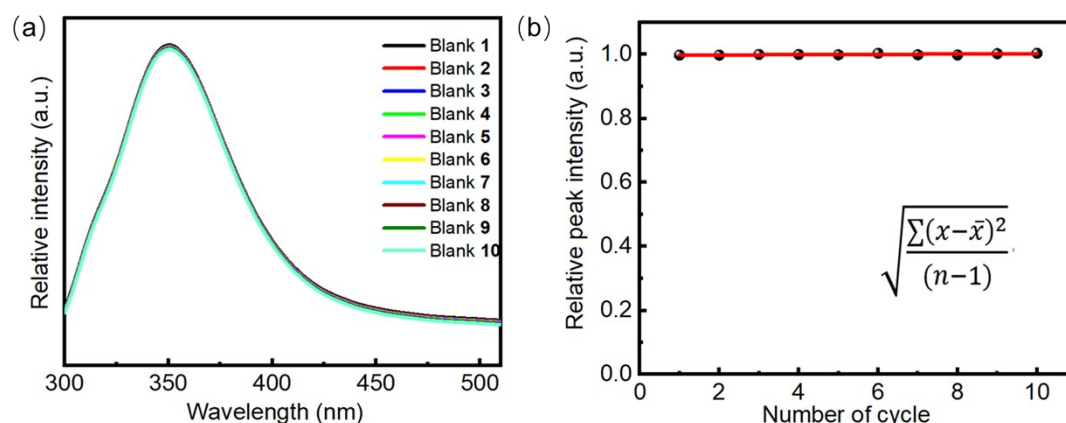

**Fig. S7** The photoluminescence spectra from ten cycles blank measurements for solid state of **1**. (b) Calibration curve with blank measurements after ten cycles (insert: the standard deviation formula, where, and represent the luminescence intensity values of **1** after normalization, the average of the maximum luminescence intensity values of **1** after ten cycles and the cycles of blank measurements, respectively). The luminescence intensity values of **1** after normalization: 0.9979, 0.9977, 1.0002, 0.9996, 0.9989, 1.0035, 0.9989, 0.9983, 1.0023, 1.0036. Calculated standard deviation,  $\delta = 0.003887$ .

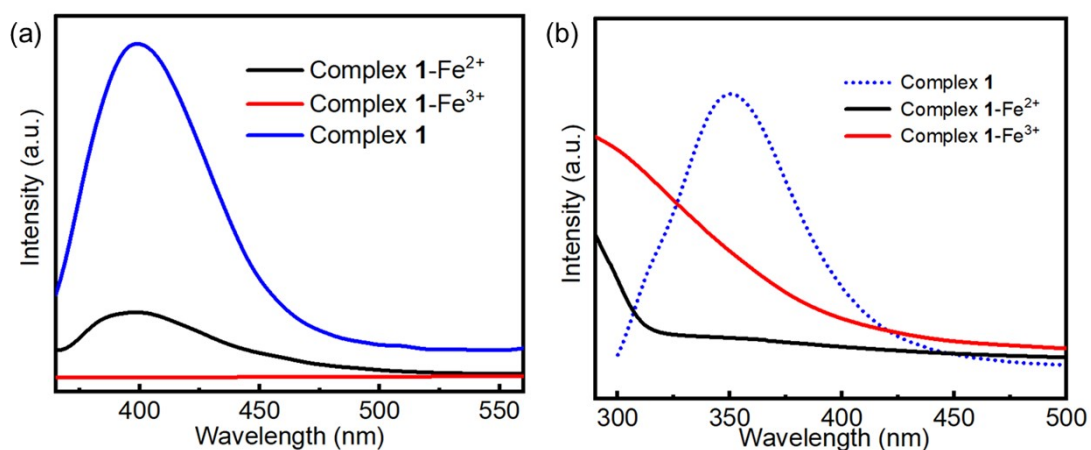

**Fig. S8** (a) The emission spectra of complex **1**, **1-Fe<sup>2+</sup>** and **1-Fe<sup>3+</sup>**; (b) UV-Vis adsorption spectra of **1-Fe<sup>2+</sup>** and **1-Fe<sup>3+</sup>** along with the emission spectrum of **1**.

## Supplementary Material (ESI)

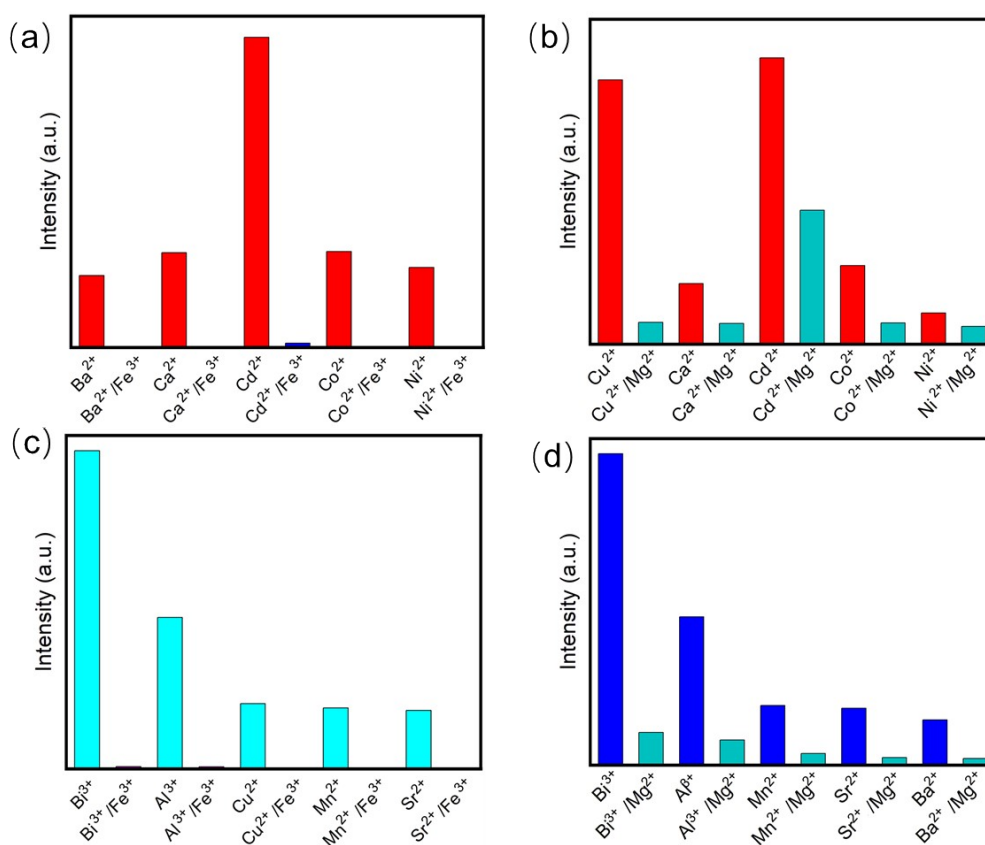

**Fig. S9** The effect of adding other metal cations on the luminescence intensity of Fe<sup>3+</sup> (0.1 M) and Mg<sup>2+</sup> cations (0.1 M).

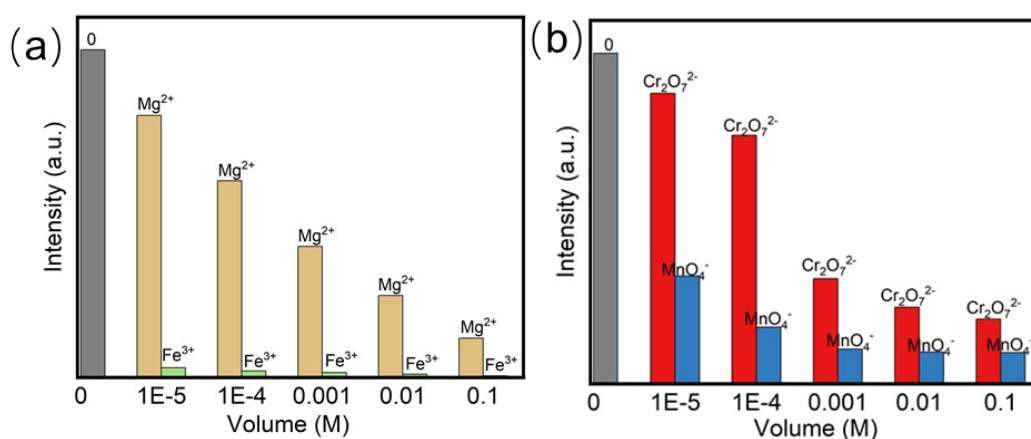

**Fig. S10** (a) Fluorescence spectra of competitive quenching of Fe<sup>3+</sup> and Mg<sup>2+</sup>; (b) Fluorescence spectra of competitive quenching of MnO<sub>4</sub><sup>-</sup> and Cr<sub>2</sub>O<sub>7</sub><sup>2-</sup>.



## Supplementary Material (ESI)

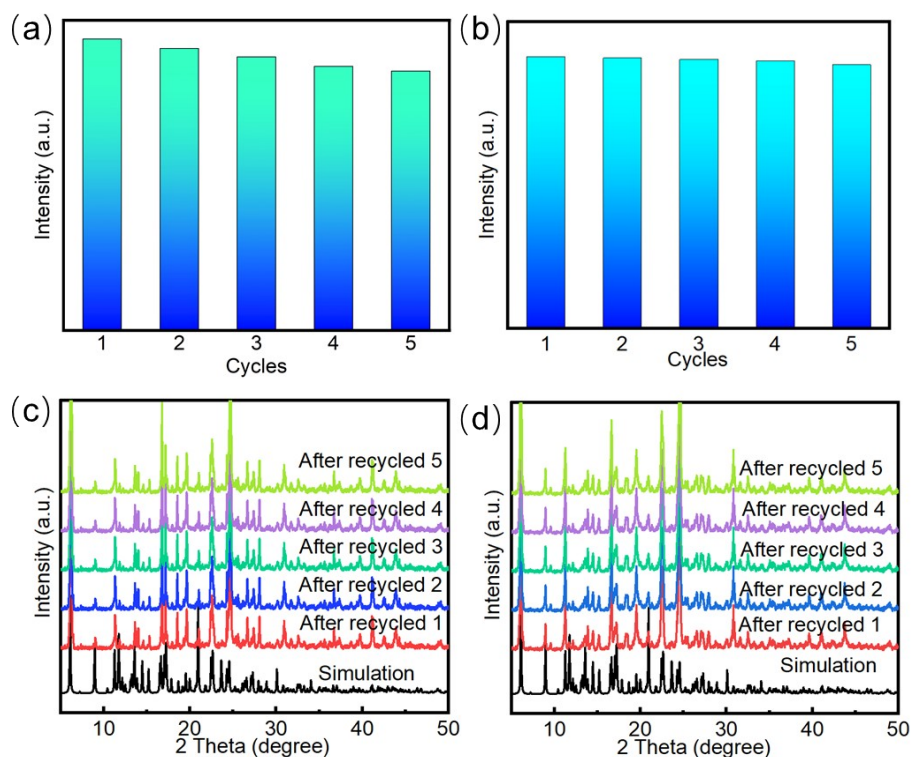

**Fig. S11** The cyclic response of the luminescence intensities of **1** for detecting  $\text{Fe}^{3+}$  (a) and  $\text{Mg}^{2+}$  (b); The PXRD patterns of **1** treated by the  $\text{Fe}^{3+}$  (c), and  $\text{Mg}^{2+}$  (d).

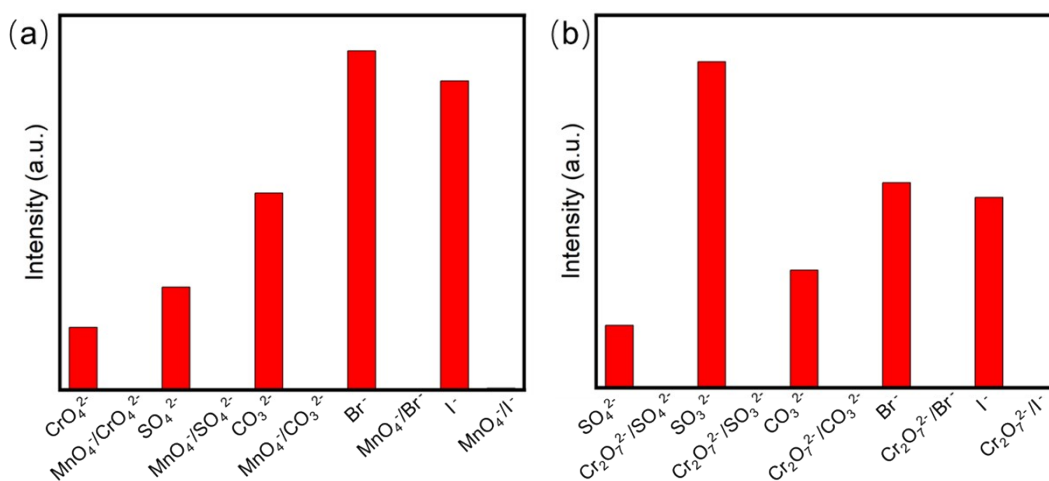

**Fig. S12** The effect of adding other metal cations on the luminescence intensity of  $\text{MnO}_4^-$  (0.1 M) and  $\text{Cr}_2\text{O}_7^{2-}$  cations (0.1 M).

## Supplementary Material (ESI)

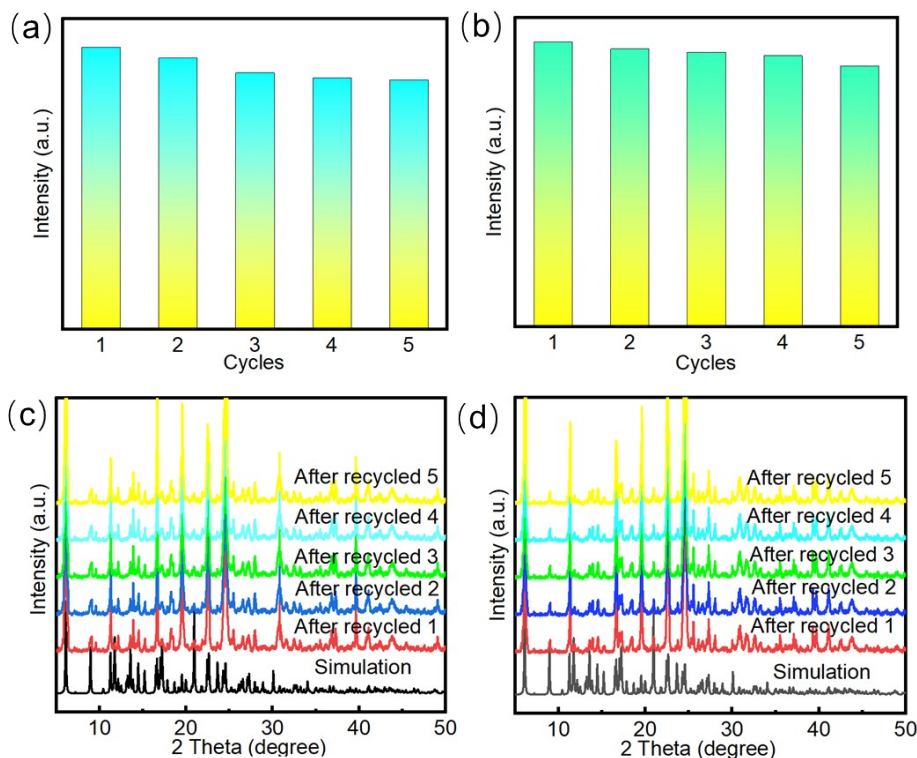

**Fig. S13** The cyclic response of the luminescence intensities of **1** for detecting  $\text{Cr}_2\text{O}_7^{2-}$  (a) and  $\text{MnO}_4^-$  (b); The PXRD patterns of **1** treated by the  $\text{Cr}_2\text{O}_7^{2-}$  (c), and  $\text{MnO}_4^-$  (d)

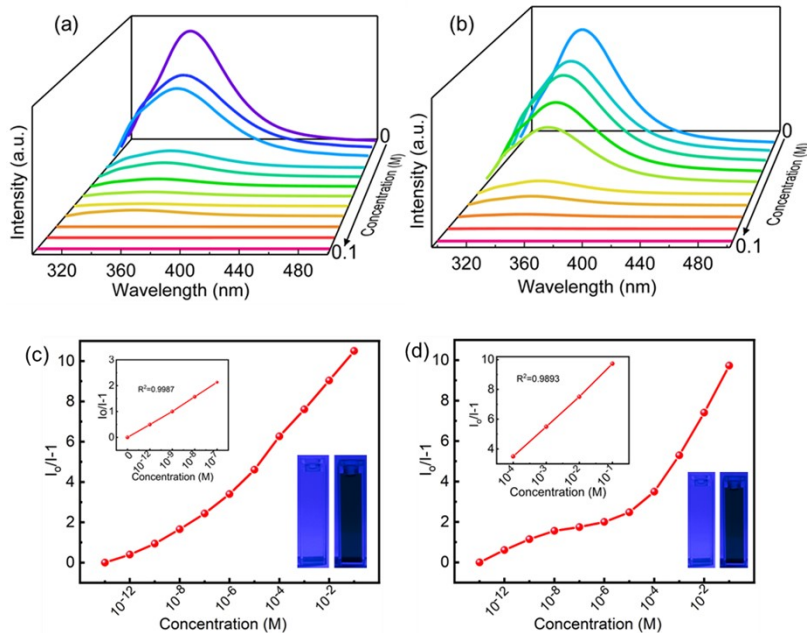

**Fig. S14** Luminescence recognition experiments of NB (a) and NM (b) in  $\text{H}_2\text{O}$ .  $K_{sv}$  plots of **1** for sensing of NB (c) and NM (d). (Insert: the linear correlation at higher concentrations).

## Supplementary Material (ESI)

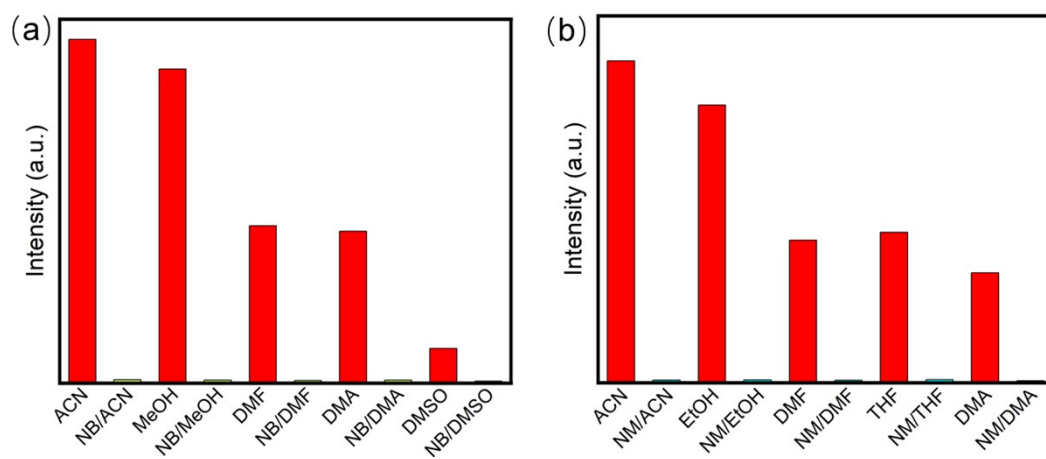

**Fig. S15** The effect of adding other organic solvents on the luminescence intensity of NB and NM.

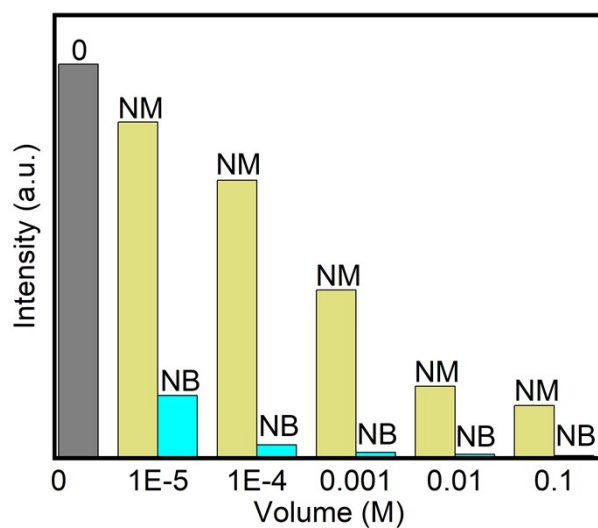

**Fig. S16** Fluorescence spectra of competitive quenching of Fe<sup>3+</sup> and Mg<sup>2+</sup>.

## Supplementary Material (ESI)

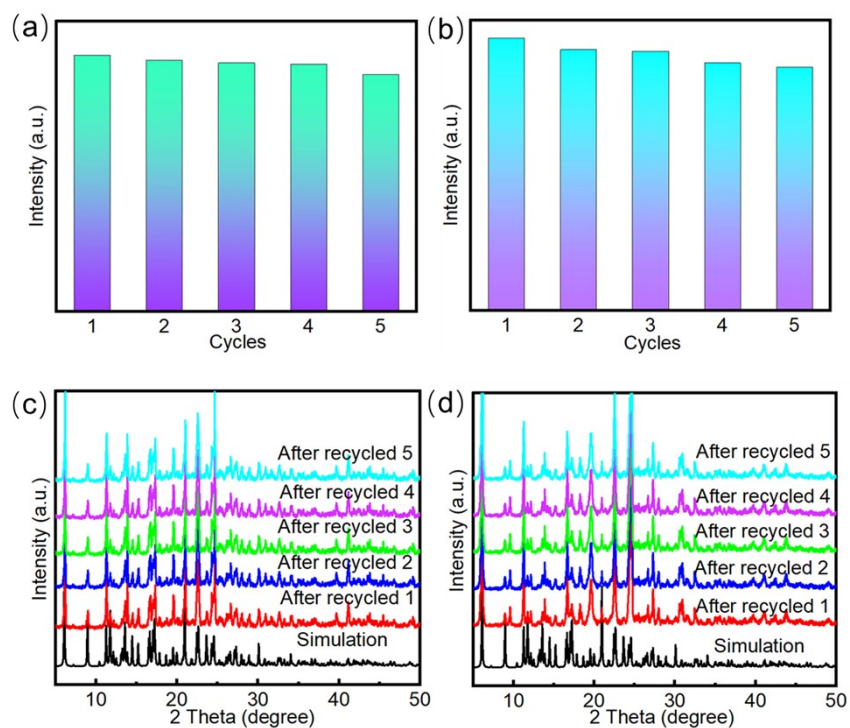

**Fig. S17** The cyclic response of the luminescence intensities of **1** for detecting NB (a) and NM (b). The PXRD patterns of **1** treated by the NB(c), and NM (d)

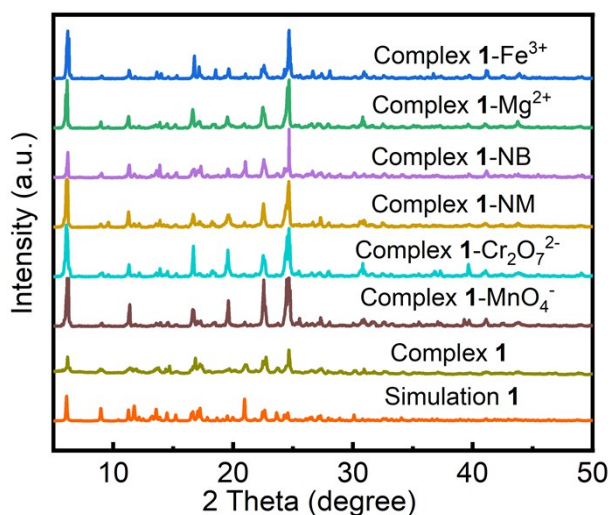

**Fig. S18** The PXRD patterns of **1** before and after exposure to different analytes.

## Supplementary Material (ESI)

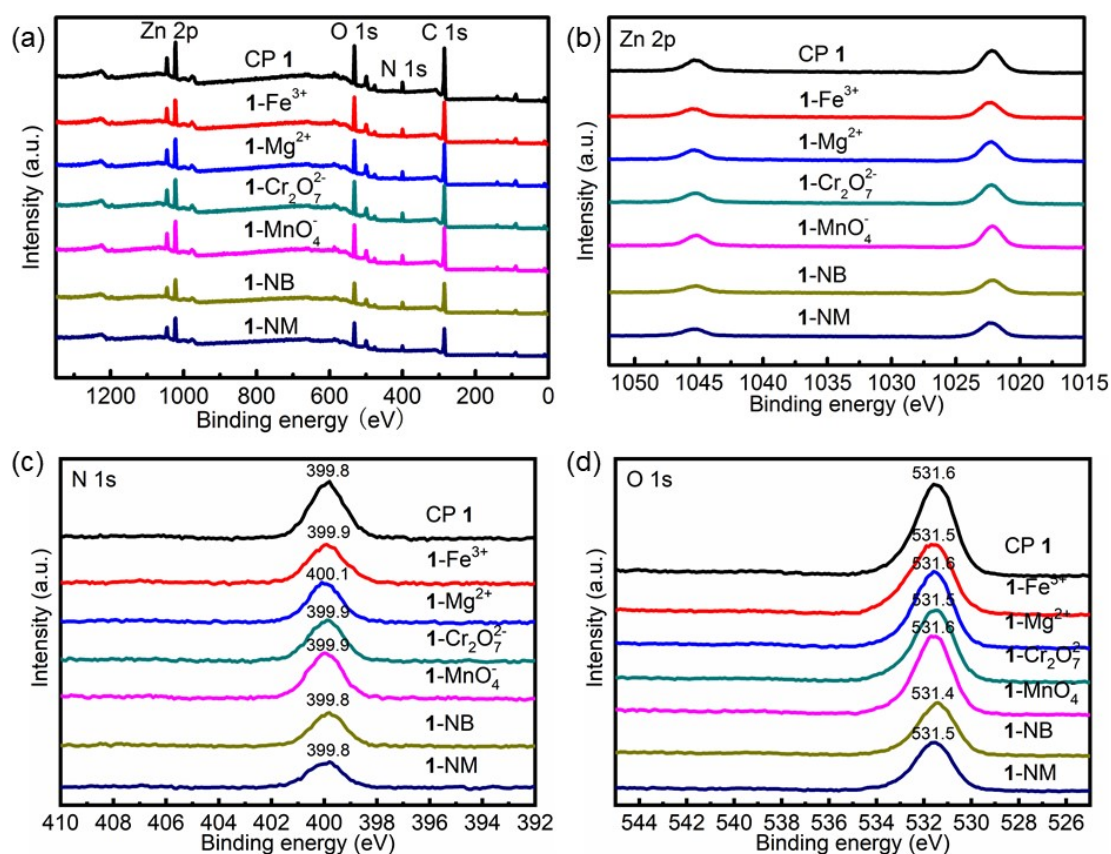

**Fig. S19** XPS spectra of CP 1, 1-Fe<sup>3+</sup>, 1-Mg<sup>2+</sup>, 1-Cr<sub>2</sub>O<sub>7</sub><sup>2-</sup>, 1-MnO<sub>4</sub><sup>-</sup>, 1-NB and 1-NM. XPS analysis of the Zn2p (b), N1s (c) and O1s (d) spectra of different samples.

### References:

- S1 H. K. Sadhanala, S. Pagidi and A. Gedanken, *J. Mater. Chem. C*, 2021, **9**, 1632–1640.
- S2 Z. Fu, J. Qin, Y. Wang, Y. Peng, Y. Zhang, D. Zhao and Z. Zhang, *Dyes Pigments*, 2021, **185**, 108896.
- S3 J. Qin, M. Wang, Z. Fu and Z. Zhang, *J. Photoch Photobio*, 2021, **405**, 112965.
- S4 X. Wang, Y. Wang, X. Wang, K. Lu, W. Jiang, P. P. Cui, H. Hao and F. Dai, *Dalton Trans*, 2020, **49**, 15473–15480.
- S5 J. Ma, N. Xu, Y. Liu, Y. Wang, H. Li, G. Liu, X. Wang and J. Li, *Inorg Chem*, 2020, **59**, 15495–15503.
- S6 T. W. T. Wiwasuku, J. B. J. Boonmak, K. S. K. Siri Wong, V. E. V. Ervithayasuporn and S. Y. S. Youngme, *Sensor Actuat B-Chem.*, 2019, **284**, 403–413.
- S7 R. Lv, J. Wang, Y. Zhang, H. Li, L. Yang, S. Liao, W. Gu and X. Liu, *J. Mater.*

## Supplementary Material (ESI)

*Chem. A*, 2016, **4**, 15494–15500.

S8 X. Wang, D. Feng, J. Tang, Y. Zhao, J. Li, J. Yang, C. K. Kim and F. Su, *Dalton Trans.*, 2019, **48**, 16776–16785.

S9 X. Y. Guo, Z. P. Dong, F. Zhao, Z. L. Liu and Y. Q. Wang, *New J. Chem.*, 2019, **43**, 2353–2361.

S10 K. S. Asha, K. Bhattacharyya and S. Mandal, *J. Mater. Chem. C*, 2014, **2**, 10073–10081.

S11 V. M. Suresh, S. J. George and T. K. Maji, *Adv. Funct. Mater.*, 2013, **23**, 5585–5590.

S12 A. Khatun, D. K. Panda, N. Sayresmith, M. G. Walter and S. Saha, *Inorg. Chem.*, 2019, **58**, 12707–12715.

S13 K. Siriwong, V. E. V. Ervithayasuporn and S. Y. S. Youngme, *Sensor Actuat. B*, 2019, **284**, 403–413.

S14 R. Goswami, S. C. Mandal, B. Pathak and S. Neogi, *ACS Appl. Mater. Interfaces*, 2019, **11**, 9042–9053.

S15 X. Wang, D. Feng, J. Tang, Y. Zhao, J. Li, J. Yang, C. K. Kim and F. Su, *Dalton Trans.*, 2019, **48**, 16776–16785.

S16 H. Fu, L. Yan, N. Wu, L. Ma and S. Zang, *J. Mater. Chem. A*, 2018, **6**, 9183–9191.

S17 C. Gogoi, M. Yousufuddin and S. Biswas, *Dalton Trans.*, 2019, **48**, 1766–1773.

S18 X. Zhang, X. Luo, N. Zhang, J. Wu and Y. Huang, *Inorg. Chem. Front.*, 2017, **4**, 1888–1894.

S19 X. Zhang, S. Li, S. Chen, F. Feng, J. Bai and J. Li, *Ecotox. Environ. Safe*, 2020, **187**, 109821.

S20 G. Ji, X. Gao, T. Zheng, W. Guan, H. Liu and Z. Liu, *Inorg. Chem.*, 2018, **57**, 10525–10532.

S21 X. L. Wang, J. X. Ma, N. Xu, Y. Wang, J. Y. Sun and G. C. Liu, *CrystEngComm*, 2021, **23**, 4760–4766.

S22 J. Ma, N. Xu, Y. Liu, Y. Wang, H. Li, G. Liu, X. Wang and J. Li, *Inorg. Chem.*, 2020, **59**, 15495–15503.

## Supplementary Material (ESI)

S23 Y. Zhou, L. Cui, Y. Zhang, Y. Liu and D. Ji, *J. Fluoresc.*, 2020, **30**, 1225–1232.

S24 W. Liu, S. Li, J. Shao and J. Tian, *J. Solid State Chem.*, 2020, **290**, 121580.
